# Supplementary material for: Prevalence and Imaging Correlates of Cerebral Diaschisis After Ischemic Stroke: A Systematic Review and Meta-Analysis
Source: MDPI journal article supplement (doi:10.3390/brainsci16010050), 2025-12-29
Supplement: s1 [file brainsci-4061369-supplementary.pdf › brainsci-4061369-supplementary.pdf]

## Supplementary Material S1

| Section and Topic             | Item # | Checklist item                                                                                                                                                                                                                                                                                       | Location where item is reported                     |
|-------------------------------|--------|------------------------------------------------------------------------------------------------------------------------------------------------------------------------------------------------------------------------------------------------------------------------------------------------------|-----------------------------------------------------|
| <b>TITLE</b>                  |        |                                                                                                                                                                                                                                                                                                      |                                                     |
| Title                         | 1      | Identify the report as a systematic review.                                                                                                                                                                                                                                                          | Title (pg1)                                         |
| <b>ABSTRACT</b>               |        |                                                                                                                                                                                                                                                                                                      |                                                     |
| Abstract                      | 2      | See the PRISMA 2020 for Abstracts checklist.                                                                                                                                                                                                                                                         | Abstract (pg1)                                      |
| <b>INTRODUCTION</b>           |        |                                                                                                                                                                                                                                                                                                      |                                                     |
| Rationale                     | 3      | Describe the rationale for the review in the context of existing knowledge.                                                                                                                                                                                                                          | Introduction (pg1-3), Figure 1                      |
| Objectives                    | 4      | Provide an explicit statement of the objective(s) or question(s) the review addresses.                                                                                                                                                                                                               | Introduction (pg2)                                  |
| <b>METHODS</b>                |        |                                                                                                                                                                                                                                                                                                      |                                                     |
| Eligibility criteria          | 5      | Specify the inclusion and exclusion criteria for the review and how studies were grouped for the syntheses.                                                                                                                                                                                          | Methods (pg3-4)                                     |
| Information sources           | 6      | Specify all databases, registers, websites, organisations, reference lists and other sources searched or consulted to identify studies. Specify the date when each source was last searched or consulted.                                                                                            | Methods (pg3-5), Figure 2                           |
| Search strategy               | 7      | Present the full search strategies for all databases, registers and websites, including any filters and limits used.                                                                                                                                                                                 | Methods (pg3), Supplementary 2                      |
| Selection process             | 8      | Specify the methods used to decide whether a study met the inclusion criteria of the review, including how many reviewers screened each record and each report retrieved, whether they worked independently, and if applicable, details of automation tools used in the process.                     | Methods (pg3-4), supplementary Table 1 and Figure 2 |
| Data collection process       | 9      | Specify the methods used to collect data from reports, including how many reviewers collected data from each report, whether they worked independently, any processes for obtaining or confirming data from study investigators, and if applicable, details of automation tools used in the process. | Methods (pg3-5), supplementary Table 1 and Figure 2 |
| Data items                    | 10a    | List and define all outcomes for which data were sought. Specify whether all results that were compatible with each outcome domain in each study were sought (e.g. for all measures, time points, analyses), and if not, the methods used to decide which results to collect.                        | Methods (pg3-5)                                     |
|                               | 10b    | List and define all other variables for which data were sought (e.g. participant and intervention characteristics, funding sources). Describe any assumptions made about any missing or unclear information.                                                                                         | Methods (pg3-6)                                     |
| Study risk of bias assessment | 11     | Specify the methods used to assess risk of bias in the included studies, including details of the tool(s) used, how many reviewers assessed each study and whether they worked independently, and if applicable, details of automation tools used in the process.                                    | Methods (pg3-4)                                     |
| Effect measures               | 12     | Specify for each outcome the effect measure(s) (e.g. risk ratio, mean difference) used in the synthesis or presentation of results.                                                                                                                                                                  | Methods (pg3-5)                                     |
| Synthesis methods             | 13a    | Describe the processes used to decide which studies were eligible for each synthesis (e.g. tabulating the study intervention characteristics and comparing against the planned groups for each synthesis (item #5)).                                                                                 | Methods (pg3-5), Supplementary Table 1              |
|                               | 13b    | Describe any methods required to prepare the data for presentation or synthesis, such as handling of missing summary statistics, or data conversions.                                                                                                                                                | Methods (pg3-5), Supplementary Table 1              |
|                               | 13c    | Describe any methods used to tabulate or visually display results of individual studies and syntheses.                                                                                                                                                                                               | Supplementary Table 1                               |
|                               | 13d    | Describe any methods used to synthesize results and provide a rationale for the choice(s). If meta-analysis was performed, describe the model(s), method(s) to identify the presence and extent of statistical heterogeneity, and software package(s) used.                                          | Methods (pg3-6)                                     |
|                               | 13e    | Describe any methods used to explore possible causes of heterogeneity among study results (e.g. subgroup analysis, meta-                                                                                                                                                                             | Methods (pg3-6)                                     |

| Section and Topic             | Item # | Checklist item                                                                                                                                                                                                                                                                       | Location where item is reported                           |
|-------------------------------|--------|--------------------------------------------------------------------------------------------------------------------------------------------------------------------------------------------------------------------------------------------------------------------------------------|-----------------------------------------------------------|
|                               |        | regression).                                                                                                                                                                                                                                                                         |                                                           |
|                               | 13f    | Describe any sensitivity analyses conducted to assess robustness of the synthesized results.                                                                                                                                                                                         | Methods (pg3-6)                                           |
| Reporting bias assessment     | 14     | Describe any methods used to assess risk of bias due to missing results in a synthesis (arising from reporting biases).                                                                                                                                                              | Methods (pg3-6)                                           |
| Certainty assessment          | 15     | Describe any methods used to assess certainty (or confidence) in the body of evidence for an outcome.                                                                                                                                                                                | Methods (pg4-6)                                           |
| <b>RESULTS</b>                |        |                                                                                                                                                                                                                                                                                      |                                                           |
| Study selection               | 16a    | Describe the results of the search and selection process, from the number of records identified in the search to the number of studies included in the review, ideally using a flow diagram.                                                                                         | Results (pg6-7), Figure 2                                 |
|                               | 16b    | Cite studies that might appear to meet the inclusion criteria, but which were excluded, and explain why they were excluded.                                                                                                                                                          | Results (pg6-7), Figure 2                                 |
| Study characteristics         | 17     | Cite each included study and present its characteristics.                                                                                                                                                                                                                            | Results (pg6-7)                                           |
| Risk of bias in studies       | 18     | Present assessments of risk of bias for each included study.                                                                                                                                                                                                                         | Results(pg7-8)                                            |
| Results of individual studies | 19     | For all outcomes, present, for each study: (a) summary statistics for each group (where appropriate) and (b) an effect estimate and its precision (e.g. confidence/credible interval), ideally using structured tables or plots.                                                     | Results(pg7-8),<br>Supplementary Table 1                  |
| Results of syntheses          | 20a    | For each synthesis, briefly summarise the characteristics and risk of bias among contributing studies.                                                                                                                                                                               | Results(pg7-8),<br>Supplementary 3                        |
|                               | 20b    | Present results of all statistical syntheses conducted. If meta-analysis was done, present for each the summary estimate and its precision (e.g. confidence/credible interval) and measures of statistical heterogeneity. If comparing groups, describe the direction of the effect. | Results(pg6-14),Figure3-5,<br>Supplementary Table 1       |
|                               | 20c    | Present results of all investigations of possible causes of heterogeneity among study results.                                                                                                                                                                                       | Results(pg6-14),Figure3-5,<br>Supplementary 3             |
|                               | 20d    | Present results of all sensitivity analyses conducted to assess the robustness of the synthesized results.                                                                                                                                                                           | Results(pg6-14),Figure3-5,<br>Supplementary 3             |
| Reporting biases              | 21     | Present assessments of risk of bias due to missing results (arising from reporting biases) for each synthesis assessed.                                                                                                                                                              | Results(pg6-14),Figure3-5,<br>Table 1,<br>Supplementary 3 |
| Certainty of evidence         | 22     | Present assessments of certainty (or confidence) in the body of evidence for each outcome assessed.                                                                                                                                                                                  | Results(pg6-14),Figure3-5,<br>Table 1,<br>Supplementary 3 |
| <b>DISCUSSION</b>             |        |                                                                                                                                                                                                                                                                                      |                                                           |
| Discussion                    | 23a    | Provide a general interpretation of the results in the context of other evidence.                                                                                                                                                                                                    | Discussion (pg14-17)                                      |
|                               | 23b    | Discuss any limitations of the evidence included in the review.                                                                                                                                                                                                                      | Discussion (pg14-17)                                      |
|                               | 23c    | Discuss any limitations of the review processes used.                                                                                                                                                                                                                                | Discussion (pg16)                                         |
|                               | 23d    | Discuss implications of the results for practice, policy, and future research.                                                                                                                                                                                                       | Discussion (pg16-17)                                      |
| <b>OTHER INFORMATION</b>      |        |                                                                                                                                                                                                                                                                                      |                                                           |
| Registration and protocol     | 24a    | Provide registration information for the review, including register name and registration number, or state that the review was not registered.                                                                                                                                       | Methods (pg3)                                             |

| Section and Topic                              | Item # | Checklist item                                                                                                                                                                                                                             | Location where item is reported       |
|------------------------------------------------|--------|--------------------------------------------------------------------------------------------------------------------------------------------------------------------------------------------------------------------------------------------|---------------------------------------|
|                                                | 24b    | Indicate where the review protocol can be accessed, or state that a protocol was not prepared.                                                                                                                                             | Methods (pg3-4)                       |
|                                                | 24c    | Describe and explain any amendments to information provided at registration or in the protocol.                                                                                                                                            | Methods (pg3-4)                       |
| Support                                        | 25     | Describe sources of financial or non-financial support for the review, and the role of the funders or sponsors in the review.                                                                                                              | Acknowledgments (pg17)                |
| Competing interests                            | 26     | Declare any competing interests of review authors.                                                                                                                                                                                         | Conflict of Interest statement (pg17) |
| Availability of data, code and other materials | 27     | Report which of the following are publicly available and where they can be found: template data collection forms; data extracted from included studies; data used for all analyses; analytic code; any other materials used in the review. | Methods (pg 3-4)                      |

*From:* Page MJ, McKenzie JE, Bossuyt PM, Boutron I, Hoffmann TC, Mulrow CD, et al. The PRISMA 2020 statement: an updated guideline for reporting systematic reviews. BMJ 2021;372:n71. doi: 10.1136/bmj.n71. This work is licensed under CC BY 4.0. To view a copy of this license, visit <https://creativecommons.org/licenses/by/4.0/>

Registered records published and stable

| ID              | Review                                                                                                                                             | Date created  | Last edited   |
|-----------------|----------------------------------------------------------------------------------------------------------------------------------------------------|---------------|---------------|
| CRD420251017909 | Prevalence and Detection Rates of Diaschisis in Ischemic Stroke Patients Using Different Imaging Techniques: A Systematic Review and Meta-Analysis | 23 March 2025 | 24 March 2025 |

## Supplementary Material S2

### PubMed (search before 2024.2.24 )

#### 1. The MeSH words for Stroke:

Stroke; Strokes; Cerebrovascular Accident; Cerebrovascular Accidents; CVA (Cerebrovascular Accident); CVAs (Cerebrovascular Accident); Cerebrovascular Apoplexy; Apoplexy, Cerebrovascular; Vascular Accident; Brain; Brain Vascular Accident; Brain Vascular Accidents; Vascular Accidents; Brain, Cerebrovascular Stroke; Cerebrovascular Strokes; Stroke, Cerebrovascular; Strokes, Cerebrovascular, Apoplexy; Cerebral Stroke; Cerebral Strokes; Stroke, Cerebral; Strokes, Cerebral; Stroke, Acute; Acute Stroke; Acute Strokes; Strokes, Acute; Cerebrovascular Accident, Acute; Acute Cerebrovascular Accident; Acute Cerebrovascular Accidents; Cerebrovascular Accidents, Acute

#### 2. The MeSH words for Diaschisis/Functional disconnection:

Diaschisis; Connectional Diaschisis; Diaschisis, Connectional; Focal Diaschisis; Diaschisis, Focal; functional disconnection

#### 3. The overall search strategy:

((((((((((((((((((((Stroke) OR (Strokes)) OR (Cerebrovascular Accident)) OR (Cerebrovascular Accidents)) OR (CVA (Cerebrovascular Accident))) OR (CVAs (Cerebrovascular Accident))) OR (Cerebrovascular Apoplexy)) OR (Apoplexy, Cerebrovascular)) OR (Vascular Accident, Brain)) OR (Brain Vascular Accident)) OR (Brain Vascular Accidents)) OR (Vascular Accidents, Brain)) OR (Cerebrovascular Stroke)) OR (Cerebrovascular Strokes)) OR (Stroke, Cerebrovascular)) OR (Strokes, Cerebrovascular)) OR (Apoplexy)) OR (Cerebral Stroke)) OR (Cerebral Strokes)) OR (Stroke, Cerebral)) OR (Strokes, Cerebral)) OR (Stroke, Acute)) OR (Acute Stroke)) OR (Acute Strokes)) OR (Strokes, Acute)) OR (Cerebrovascular Accident, Acute)) OR (Acute Cerebrovascular Accident)) OR (Acute Cerebrovascular Accidents)) OR (Cerebrovascular Accidents, Acute)) AND (((((Diaschisis) OR (Connectional Diaschisis)) OR (Diaschisis, Connectional)) OR (Focal Diaschisis)) OR (Diaschisis, Focal)) OR (functional disconnection))

### Embase (search before 2024.2.24 )

#### 1. The MeSH words for Stroke:

'accident, cerebrovascular' OR 'acute cerebrovascular lesion' OR 'acute focal cerebral vasculopathy' OR 'acute stroke' OR 'apoplectic stroke' OR 'apoplexia' OR 'apoplexy' OR 'blood flow disturbance, brain' OR 'brain accident' OR 'brain attack' OR 'brain blood flow disturbance' OR 'brain insult' OR 'brain insultus' OR 'brain vascular accident' OR 'cerebral apoplexia' OR 'cerebral insult' OR 'cerebral stroke' OR 'cerebral vascular accident' OR 'cerebral vascular insufficiency' OR 'cerebro vascular accident' OR 'cerebrovascular arrest' OR 'cerebrovascular failure' OR 'cerebrovascular injury' OR 'cerebrovascular insufficiency' OR 'cerebrovascular insult' OR 'cerebrum vascular accident' OR 'cryptogenic stroke' OR 'CVA' OR 'insultus cerebialis' OR 'ischaemic seizure' OR 'ischemic seizure' OR 'stroke' OR 'thrombotic stroke' OR 'cerebrovascular accident'

#### 2. The MeSH words for Diaschisis/Functional disconnection:

'diaschises' OR 'diaschisis' OR 'functional disconnection'

#### 3. The overall search strategy:

('functional disconnection' OR 'diaschises'/exp OR 'diaschises' OR 'diaschisis'/exp OR 'diaschisis') AND ('accident, cerebrovascular'/exp OR 'accident, cerebrovascular' OR 'acute cerebrovascular lesion'/exp OR 'acute cerebrovascular lesion' OR 'acute focal cerebral vasculopathy'/exp OR 'acute focal cerebral vasculopathy' OR 'acute stroke'/exp OR 'acute stroke' OR 'apoplectic stroke'/exp OR 'apoplectic stroke' OR 'apoplexia'/exp OR 'apoplexia' OR 'apoplexy'/exp OR 'apoplexy' OR 'blood flow disturbance, brain'/exp OR 'blood flow disturbance, brain' OR 'brain accident'/exp OR 'brain accident' OR 'brain attack'/exp OR 'brain attack' OR 'brain blood flow disturbance'/exp OR 'brain blood flow disturbance' OR 'brain insult'/exp OR 'brain insult' OR 'brain insultus'/exp OR 'brain insultus' OR 'brain vascular accident'/exp OR 'brain vascular accident' OR 'cerebral apoplexia'/exp OR 'cerebral apoplexia' OR 'cerebral insult'/exp OR 'cerebral insult' OR 'cerebral stroke'/exp OR 'cerebral stroke' OR 'cerebral vascular accident'/exp OR 'cerebral vascular accident' OR 'cerebral vascular insufficiency'/exp OR 'cerebral vascular insufficiency' OR 'cerebro vascular accident'/exp OR 'cerebro vascular accident' OR 'cerebrovascular arrest'/exp OR 'cerebrovascular arrest' OR 'cerebrovascular failure'/exp OR 'cerebrovascular failure' OR 'cerebrovascular injury'/exp OR 'cerebrovascular injury' OR 'cerebrovascular insufficiency'/exp OR 'cerebrovascular insufficiency' OR 'cerebrovascular insult'/exp OR 'cerebrovascular insult' OR 'cerebrum vascular accident'/exp OR 'cerebrum vascular accident' OR 'cryptogenic stroke'/exp OR 'cryptogenic stroke' OR 'cva'/exp OR 'cva' OR 'insultus cerebialis'/exp OR 'insultus cerebialis' OR 'ischaemic seizure'/exp OR 'ischaemic seizure' OR 'ischemic seizure'/exp OR 'ischemic seizure' OR 'stroke'/exp OR 'stroke' OR 'thrombotic stroke'/exp OR 'thrombotic stroke' OR 'cerebrovascular accident'/exp OR 'cerebrovascular accident')

## Supplementary Material S3

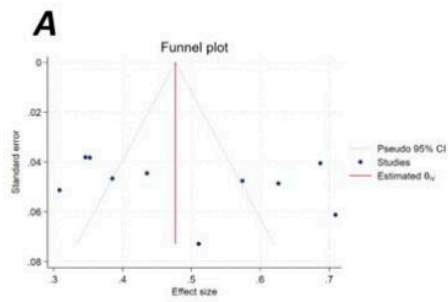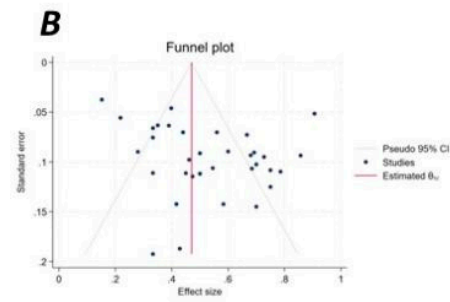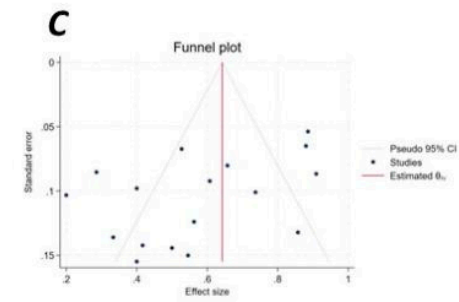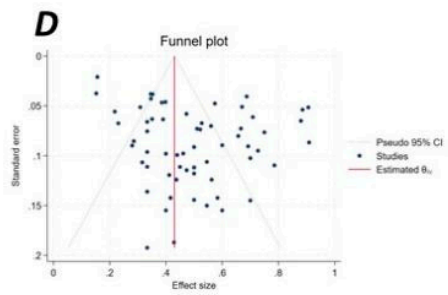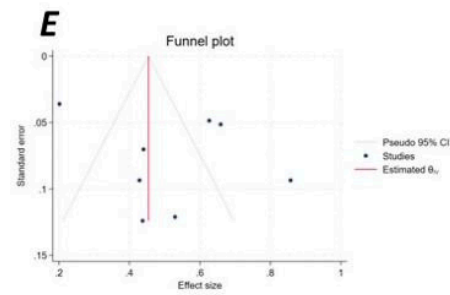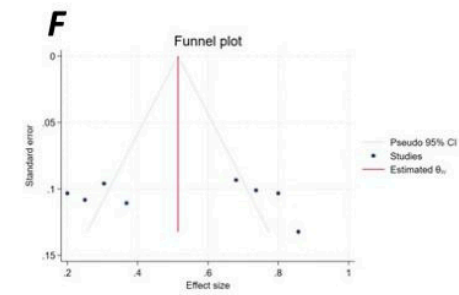

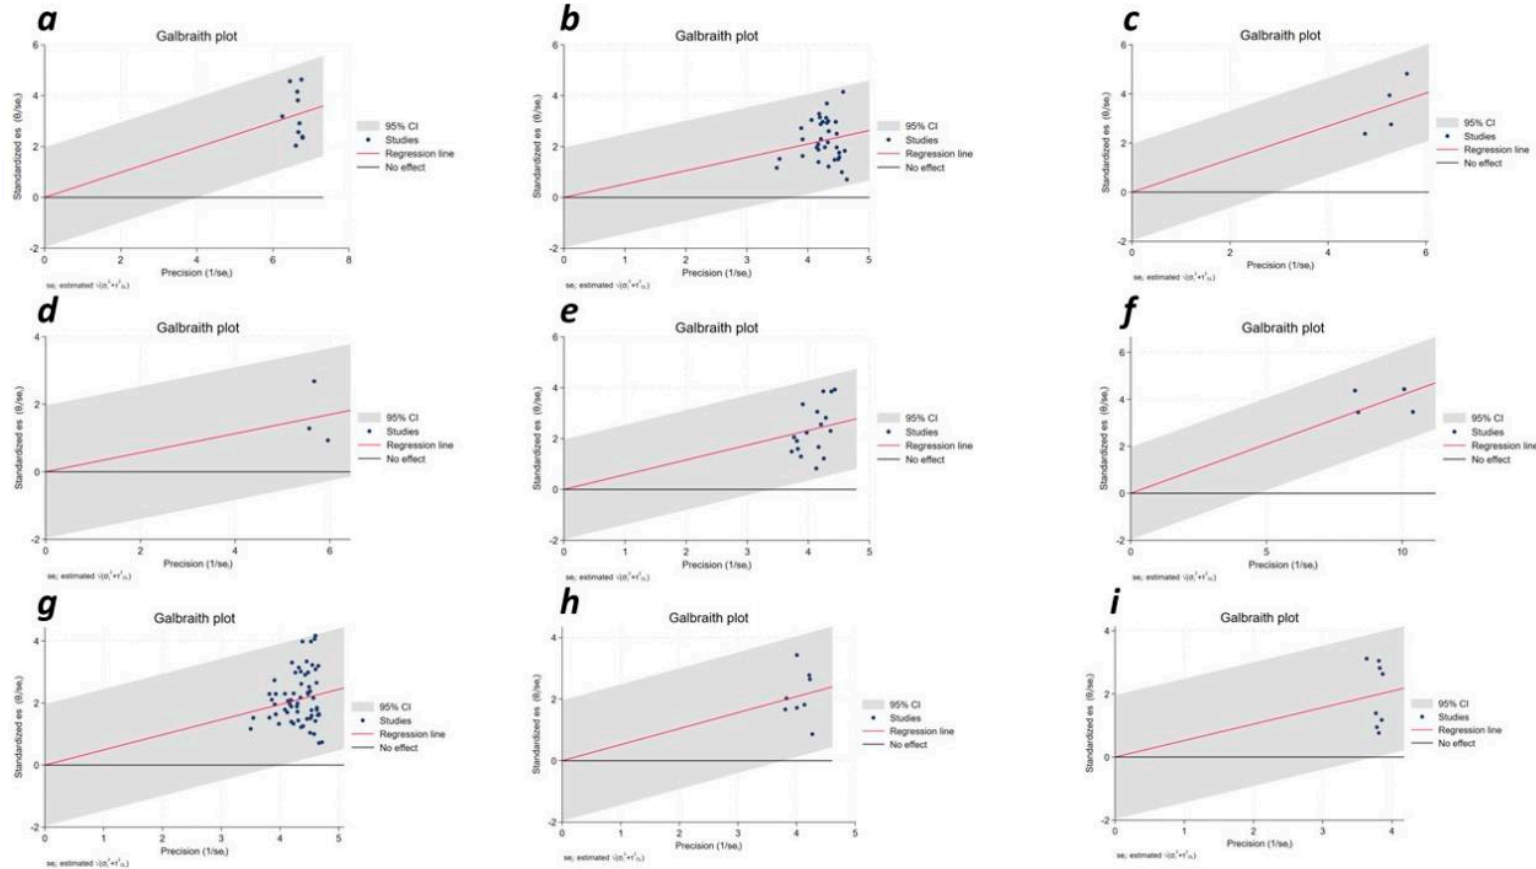

**Supplementary Material S3: A-F:** **A** is funnel plot for ischemic stroke with CTP. **B** is funnel plot for ischemic stroke with SPECT. **C** is funnel plot for ischemic stroke with PET. **D** is funnel plot for crossed cerebellar diaschisis (CCD) in patients with ischemic stroke. **E** is funnel plot for Ipsilateral Thalamic Diaschisis (ITD) in patients with ischemic stroke. **F** is funnel plot for other Types of Diaschisis in patients with ischemic stroke. **a-i:** **a** is Galbraith plot for ischemic stroke with CTP. **b** is Galbraith plot for ischemic stroke with SPECT. **c** is Galbraith plot for ischemic stroke with ASL MRI. **d** is Galbraith plot for ischemic stroke with DSC-PWI. **e** is Galbraith plot for ischemic stroke with PET. **f** is Galbraith plot for ischemic stroke with fMRI. **g** is Galbraith plot for crossed cerebellar diaschisis (CCD) in patients with ischemic stroke. **h** is Galbraith plot for Ipsilateral Thalamic Diaschisis (ITD) in patients with ischemic stroke. **i** is Galbraith plot for other Types of Diaschisis in patients with ischemic stroke.

Supplementary Table S1.

| <b>Supplementary Table S1: Data extraction of clinical aspects of patients with ischemic stroke in seven neuroimaging modalities</b> |                     |            |                      |                       |      |                            |                                    |                                 |                                        |                 |                             |          |
|--------------------------------------------------------------------------------------------------------------------------------------|---------------------|------------|----------------------|-----------------------|------|----------------------------|------------------------------------|---------------------------------|----------------------------------------|-----------------|-----------------------------|----------|
| Reference                                                                                                                            | Patients and Gender | Age        | Study type           | Country and Continent | NO S | NHISS admission            | After the onset of Stroke          | Type of vessels                 | Type of Diaschisis                     | Follow-up       | Isotopic tracer             | Modality |
| Chenghua Wu 2022                                                                                                                     | n=47, M 28, F 19    | 62.49±8.16 | Cross-sectional      | China, Asia           | 8    | NHISS admission: 2.46±2.95 | After the onset of Stroke: 24h-3m  | Type of vessels: ICA/MCA        | CCD=24                                 | No follow-up    | Iohexol                     | CTP      |
| Miao Zhang 2019                                                                                                                      | n=108, M 76, F 32   | 65.6±15.8  | Retrospective cohort | China, Asia           | 7    | No NHISS admission         | After the onset of Stroke: ≤6h     | Type of vessels: ICA/MCA/ACA    | CCD=62                                 | No follow-up    | Iodinated contrast material | VPCT     |
| Wolfgang G Kunz 2017                                                                                                                 | n=156, M 69, F 87   | 73(58-82)  | Retrospective cohort | Germany, Europe       | 9    | NHISS admission: 14(9-17)  | After the onset of Stroke: ≤2d     | Type of vessels: ICA/MCA        | CCD=54                                 | No follow-up    | Iohexol                     | WB-CTP   |
| Wieland H Sommer 2015                                                                                                                | n=156, M 44, F 112  | 69.7±14.9  | Case-control         | Germany, Europe       | 7    | No NHISS admission         | After the onset of Stroke: ≤1d     | Type of vessels: MCA            | CCD=55                                 | No follow-up    | Iodinated contrast material | WB-CTP   |
| Anissa Abderrakib 2023                                                                                                               | n=131               | 70.6±14.8  | Cross-sectional      | Belgium, Europe       | 8    | NHISS admission: 15.9±7.8  | After the onset of Stroke: ≤7.5h   | Type of vessels: ICA/MCA/ACA    | CCD=90                                 | No follow-up    | Iodinated contrast material | CTP      |
| Paul Reidler 2020                                                                                                                    | n=99, M 49, F 50    | 75(63-81)  | Cross-sectional      | Germany, Europe       | 9    | NHISS admission: 14(9-17)  | After the onset of Stroke: ≤24h    | Type of vessels: ICA/MCA        | ITD=62                                 | No follow-up    | Iodinated contrast material | CTP      |
| Young Wook Jeon 2012                                                                                                                 | n=81                | Unknown    | Retrospective cohort | Korea, Asia           | 7    | No NHISS admission         | After the onset of Stroke: ≤24h    | Type of vessels: Supratentorial | CCD=25                                 | No follow-up    | Iohexol                     | CTP      |
| Marcello Naccarato 2020                                                                                                              | n=55, M 25, F 30    | 72.3±15.6  | Cross-sectional      | Italy, Europe         | 7    | NHISS admission: 6(1-22)   | After the onset of Stroke: ≤4.5h   | Type of vessels: MCA            | CCD=39                                 | No follow-up    | Contrast medium             | CTP      |
| Weijian Chen 2022                                                                                                                    | n=109, M 61, F 48   | 68.7±12.9  | Retrospective cohort | China, Asia           | 8    | NHISS admission: 10(4-16)  | After the onset of Stroke: ≤6h     | Type of vessels: ICA/MCA/ACA    | CCD=42                                 | No follow-up    | Nonionic iodine             | CTP      |
| Paul Reidler 2018                                                                                                                    | n=124, M 55, F 69   | 73(58-81)  | Cross-sectional      | Germany, Europe       | 8    | NHISS admission: 14(9-16)  | After the onset of Stroke: <5d     | Type of vessels: MCA            | CCD+ITD=54                             | No follow-up    | Iodinated contrast material | CTP      |
| F.Fazekas 1993                                                                                                                       | n=6, M 3, F 3       | 63.2±7.2   | Cross-sectional      | Austria, Europe       | 4    | No NHISS admission         | After the onset of Stroke: < 1week | Type of vessels: Upper Pontine  | CCD=2                                  | No follow-up    | <sup>123</sup> I-IMP        | SPECT    |
| Liu Y 2010                                                                                                                           | n=20, M 12, F 8     | 70±9       | Retrospective cohort | Finland, Europe       | 5    | No NHISS admission         | After the onset of Stroke: ≤48h    | Type of vessels: ICA            | CCD=10, CCD=9 (8d)                     | 8 day Follow-up | <sup>99m</sup> Tc-ECD       | SPECT    |
| T Johansson 1988                                                                                                                     | n=16, M 10, F 6     | 66(57-75)  | Cross-sectional      | Sweden, Europe        | 5    | No NHISS                   | After the onset of Stroke: 2m      | Type of vessels:                | CCD+ITD+Transhemispheric Diaschisis=12 | No follow-up    | <sup>123</sup> I-IMP        | SPECT    |



|                              |                   |             |                      |                 |   |                            |                                      |                                 |                     |              |                         |       |
|------------------------------|-------------------|-------------|----------------------|-----------------|---|----------------------------|--------------------------------------|---------------------------------|---------------------|--------------|-------------------------|-------|
|                              |                   |             |                      |                 |   | admission                  |                                      | cortical/central cerebral       |                     |              |                         |       |
| M.De Roo 1989                | n=92              | Unknown     | Cross-sectional      | Belgium, Europe | 4 | No NHISS admission         | After the onset of Stroke: ≤1w       | Type of vessels: Supratentorial | CCD=14              | No follow-up | <sup>99m</sup> Tc-HMPAO | SPECT |
| Patrice Laloux 1995          | n=55, M 38, F 17  | 71±9        | Prospective cohort   | Belgium, Europe | 7 | No NHISS admission         | After the onset of Stroke: <12h      | Type of vessels: ICA            | CCD=12              | No follow-up | <sup>99m</sup> Tc-HMPAO | SPECT |
| J.V.Bowler 1995              | n=50, M 22, F 28  | 67.86±12.9  | Cross-sectional      | UK, Europe      | 6 | No NHISS admission         | After the onset of Stroke: 0.8d-1.7d | Type of vessels: ICA/MCA        | CCD=28, ITD=22      | No follow-up | <sup>99m</sup> Tc-HMPAO | SPECT |
| Juan Wang 2020               | n=51, M 35, F 16  | 62.16±12.16 | Cross-sectional      | China, Asia     | 7 | NHISS admission: 3.12±2.16 | After the onset of Stroke: 24h-2w    | Type of vessels: MCA            | CCD=17              | No follow-up | <sup>99m</sup> Tc-ECD   | SPECT |
| Yawu Liu 2007                | n=22, M 14, F 8   | 70±9        | Retrospective cohort | Finland, Europe | 8 | NHISS admission: 9.09±7.2  | After the onset of Stroke: ≤48h      | Type of vessels: Supratentorial | CCD=12, CCD=16 (8d) | 8d Follow-up | <sup>99m</sup> Tc-ECD   | SPECT |
| Sang Eun Kim 1997            | n=26, M 18, F 8   | 55(34-77)   | Cross-sectional      | Korea, Asia     | 6 | No NHISS admission         | After the onset of Stroke: 5d-6.2y   | Type of vessels: ICA            | CCD=12              | No follow-up | <sup>99m</sup> Tc-HMPAO | SPECT |
| G.Meneghetti 1984            | n=12, M 8, F 4    | 60.42±13.42 | Cross-sectional      | Denmark, Europe | 6 | No NHISS admission         | After the onset of Stroke: ≤3d       | Type of vessels: Supratentorial | CCD=5               | No follow-up | <sup>133</sup> Xe       | SPECT |
| Yuichi Komaba 2004           | n=113, M 75, F 38 | 66±13       | Retrospective cohort | Japan, Asia     | 8 | No NHISS admission         | After the onset of Stroke: ≤1m       | Type of vessels: ICA            | CCD=45              | No follow-up | <sup>123</sup> I-IMP    | SPECT |
| P.Pantano 1987               | n=59, M 46, F 13  | 58±11.5     | Cross-sectional      | Italy, Europe   | 7 | No NHISS admission         | After the onset of Stroke: ≤5y       | Type of vessels: ICA            | CCD=23              | No follow-up | <sup>123</sup> I-HIPDM  | SPECT |
| Makiko Ishihara 1998         | n=32, M 17, F 15  | 61(20-87)   | Retrospective cohort | Japan, Asia     | 6 | No NHISS admission         | After the onset of Stroke: ≤3m       | Type of vessels: MCA            | CCD=29              | No follow-up | <sup>123</sup> I-IMP    | SPECT |
| Juan Wang 2019               | n=39, M 25, F 14  | 62.41±12.97 | Retrospective cohort | China, Asia     | 7 | NHISS admission: 3.15±2.21 | After the onset of Stroke: 24h-2w    | Type of vessels: ICA            | CCD=13              | No follow-up | <sup>99m</sup> Tc-ECD   | SPECT |
| Marian Gómez Beldarrain 1997 | n=19              | Unknown     | Case-control         | Spain, Europe   | 5 | No NHISS admission         | After the onset of Stroke: ≥3w       | Type of vessels: Cerebellar     | CCD+ICD=13          | No follow-up | <sup>99m</sup> Tc-HMPAO | SPECT |
| M.STEINLING 1993             | n=7, M 3, F 4     | 54(33-70)   | Cross-sectional      | France, Europe  | 5 | No NHISS admission         | After the onset of Stroke: 2w-12w    | Type of vessels: MCA            | CCD=3               | No follow-up | <sup>123</sup> I-IMP    | SPECT |

|                                |                     |                 |                          |                             |   |                              |                                             |                                        |    |                                     |                       |                                                        |       |
|--------------------------------|---------------------|-----------------|--------------------------|-----------------------------|---|------------------------------|---------------------------------------------|----------------------------------------|----|-------------------------------------|-----------------------|--------------------------------------------------------|-------|
| J.NUUTINE<br>N 2000            | n=20, M<br>7, F 13  | 70(45-86)       | Cross-<br>sectional      | Finland,<br>Europe          | 6 | No<br>NHISS<br>admissio<br>n | After the onset<br>of Stroke: ≤24h          | Type<br>vessels:<br>MCA                | of | CCD=10, CCD=14 (3d)                 | 3d Follow-up          | <sup>99m</sup> Tc-<br>HMPAO+ <sup>99m</sup> Tc-<br>ECD | SPECT |
| Nobuhiko<br>MIYAZAWA<br>2001   | n=30, M<br>24, F 6  | 56.5(36-<br>71) | Cross-<br>sectional      | Japan,<br>Asia              | 8 | No<br>NHISS<br>admissio<br>n | After the onset<br>of Stroke:<br>41.5±21.3d | Type<br>vessels:<br>ICA/MCA            | of | CCD=18                              | No follow-up          | <sup>123</sup> I-IMP                                   | SPECT |
| Thomas<br>G.Brott 1986         | n=30                | Unknown         | Cross-<br>sectional      | USA,<br>North<br>America    | 5 | No<br>NHISS<br>admissio<br>n | After the onset<br>of Stroke: 72h-<br>40d   | Type<br>vessels:<br>Supratentori<br>al | of | CCD=15                              | No follow-up          | <sup>123</sup> I-HIPDM                                 | SPECT |
| J V Bowler<br>1992             | n=18, M<br>6, F 12  | 71.06±11.3<br>6 | Cross-<br>sectional      | UK,<br>Europe               | 5 | No<br>NHISS<br>admissio<br>n | After the onset<br>of Stroke: 11.9d/<br>≤4d | Type<br>vessels:<br>Lacunar            | of | CCD=6                               | No follow-up          | <sup>99m</sup> Tc-HMPAO                                | SPECT |
| Y Sakashita<br>1993            | n=14, M<br>8, F 6   | 76.2±7.3        | Cross-<br>sectional      | Japan,<br>Asia              | 6 | No<br>NHISS<br>admissio<br>n | After the onset<br>of Stroke: 5d-<br>22d    | Type<br>vessels:<br>MCA/ACA            | of | CCD=11, ITD=12                      | No follow-up          | <sup>123</sup> I-IMP                                   | SPECT |
| Jean-Luc<br>Moretti 1989       | n=10, M<br>6, F 4   | 65.8±12         | Cross-<br>sectional      | France,<br>Europe           | 5 | No<br>NHISS<br>admissio<br>n | After the onset<br>of Stroke: 2d-<br>97d    | Type<br>vessels:<br>MCA                | of | CCD=7                               | No follow-up          | <sup>99m</sup> Tc-HMPAO+ <sup>123</sup> I-<br>IMP      | SPECT |
| Cheng-<br>Chiang<br>Chang 2017 | n=42                | Unknown         | Cross-<br>sectional      | China,<br>Asia              | 8 | No<br>NHISS<br>admissio<br>n | After the onset<br>of Stroke: 0.5y-<br>1.5y | Type<br>vessels:<br>Supratentori<br>al | of | CCD=28                              | No follow-up          | <sup>99m</sup> Tc-ECD                                  | SPECT |
| Anna Nocuri<br>2013            | n=57, M<br>33, F 24 | 65±19.5         | Cross-<br>sectional      | Poland,<br>Europe           | 7 | No<br>NHISS<br>admissio<br>n | After the onset<br>of Stroke: 2m-<br>15m    | Type<br>vessels:<br>Supratentori<br>al | of | CCD=20                              | No follow-up          | <sup>99m</sup> Tc-ECD                                  | SPECT |
| Marc<br>Rousseaux<br>1999      | n=25, M<br>16, F 9  | 59.6±12.6       | Cross-<br>sectional      | France,<br>Europe           | 8 | No<br>NHISS<br>admissio<br>n | After the onset<br>of Stroke: ≥2w           | Type<br>vessels:<br>Cerebellar         | of | CCD=7                               | No follow-up          | <sup>99m</sup> Tc-<br>HMPAO+ <sup>133</sup> Xe         | SPECT |
| W.Y.LIN<br>1996                | n=12, M<br>9, F 3   | 67.25±6.17      | Cross-<br>sectional      | China,<br>Asia              | 6 | No<br>NHISS<br>admissio<br>n | After the onset<br>of Stroke: ≤1d           | Type<br>vessels:<br>MCA                | of | CCD=9                               | 1w/2w/3w<br>follow-up | <sup>99m</sup> Tc-HMPAO                                | SPECT |
| J.Frits de<br>Bruine 1990      | n=26                | Unknown         | Retrospecti<br>ve cohort | USA,<br>North<br>America    | 5 | No<br>NHISS<br>admissio<br>n | After the onset<br>of Stroke: ≤24h          | Type<br>vessels:<br>MCA                | of | CCD=18                              | No follow-up          | <sup>201</sup> Tl-DDC                                  | SPECT |
| M.I.Botez<br>1991              | n=25, M<br>15, F 10 | 45.76±14.7<br>5 | Case-<br>control         | Canada,<br>North<br>America | 6 | No<br>NHISS<br>admissio<br>n | After the onset<br>of Stroke:<br>≥1year     | Type<br>vessels:<br>Cerebellar         | of | Cerebello-cerebral<br>Diaschisis=17 | No follow-up          | <sup>99m</sup> Tc-HMPAO                                | SPECT |
| Ryoo<br>Yamamoto<br>2015       | n=12, M<br>11, F 1  | 72.42±8.97      | Retrospecti<br>ve cohort | Japan,<br>Asia              | 6 | No<br>NHISS<br>admissio<br>n | After the onset<br>of Stroke: ≤2w           | Type<br>vessels:<br>Small<br>vessels   | of | CCD=7                               | No follow-up          | <sup>99m</sup> Tc-ECD                                  | SPECT |
| Daniela<br>Perani 1988         | n=19, M<br>14, F 5  | 58.3±11.9       | Retrospecti<br>ve cohort | Italy,<br>Europe            | 7 | No<br>NHISS<br>admissio<br>n | After the onset<br>of Stroke: 2d-<br>24m    | Type<br>vessels:<br>Small<br>vessels   | of | CCD=9                               | No follow-up          | <sup>123</sup> I-IMP                                   | SPECT |

|                             |                     |                 |                          |                          |   |                                       |                                                      |                                           |                                        |              |                                                 |         |
|-----------------------------|---------------------|-----------------|--------------------------|--------------------------|---|---------------------------------------|------------------------------------------------------|-------------------------------------------|----------------------------------------|--------------|-------------------------------------------------|---------|
| Cong Xia<br>2021            | n=85, M<br>65, F 20 | 52.2±11.4       | Retrospecti<br>ve cohort | China,<br>Asia           | 7 | NHISS<br>admissio<br>n: 8(5.5-<br>12) | After the onset<br>of Stroke: 6h-<br>3d,3d-7d,7d-30d | Type of<br>vessels:<br>MCA                | ITD+CCD=73                             | No follow-up |                                                 | ASL MRI |
| Shuai Chen<br>2014          | n=46, M<br>34, F 12 | 56.89±10.4<br>2 | Cross-<br>sectional      | China,<br>Asia           | 5 | No<br>NHISS<br>admissio<br>n          | After the onset<br>of Stroke: 1w-3w                  | Type of<br>vessels:<br>Supratentori<br>al | CCD=24                                 | No follow-up |                                                 | ASL MRI |
| Koung Mi<br>Kang 2017       | n=32, M<br>21, F 11 | 62.6±14         | Cross-<br>sectional      | Korea,<br>Asia           | 8 | NHISS<br>admissio<br>n: 4.5(2-<br>13) | After the onset<br>of Stroke: ≤8h                    | Type of<br>vessels:<br>Supratentori<br>al | CCD=24                                 | No follow-up |                                                 | ASL MRI |
| Megan<br>K.Strother<br>2016 | n=18, M<br>7, F 11  | 47.8±16.1       | Cross-<br>sectional      | USA,<br>North<br>America | 7 | No<br>NHISS<br>admissio<br>n          | After the onset<br>of Stroke: ≥2m                    | Type of<br>vessels:<br>Supratentori<br>al | CCD=9                                  | No follow-up |                                                 | ASL MRI |
| Jianhong Ma<br>2021         | n=74, M<br>47, F 27 | 62.86±11.7<br>9 | Cross-<br>sectional      | China,<br>Asia           | 8 | No<br>NHISS<br>admissio<br>n          | After the onset<br>of Stroke: 6h-<br>72h             | Type of<br>vessels:<br>Supratentori<br>al | CCD=35                                 | No follow-up | Gd-DTPA                                         | DSC-PWI |
| Alex Förster<br>2014        | n=39, M<br>20, F 19 | 72(63-79)       | Retrospecti<br>ve cohort | Germany,<br>Europe       | 6 | No<br>NHISS<br>admissio<br>n          | After the onset<br>of Stroke: ≤1d                    | Type of<br>vessels:<br>Small<br>vessels   | CCD=9                                  | No follow-up | Contrast bolus                                  | DSC-PWI |
| D.D.M.Lin<br>2009           | n=301               | Unknown         | Retrospecti<br>ve cohort | USA,<br>North<br>America | 6 | No<br>NHISS<br>admissio<br>n          | After the onset<br>of Stroke: ≤5d                    | Type of<br>vessels:<br>Supratentori<br>al | CCD=47                                 | No follow-up |                                                 | DSC-PWI |
| R Slater<br>1977            | n=15, M<br>9, F 6   | 66(47-85)       | Retrospecti<br>ve cohort | USA,<br>North<br>America | 6 | No<br>NHISS<br>admissio<br>n          | After the onset<br>of Stroke: ≤4d                    | Type of<br>vessels:<br>ICA/MCA/AC<br>A    | Transhemispheric<br>Diaschisis=12      | No follow-up | <sup>133</sup> Xe                               | XeCT    |
| Giorgio<br>Rubin 2000       | n=23, M<br>10, F 13 | 69±14           | Cross-<br>sectional      | USA,<br>North<br>America | 6 | NHISS<br>admissio<br>n: 14±4          | After the onset<br>of Stroke: ≤8h                    | Type of<br>vessels:<br>MCA                | Ipsilateral cerebellar<br>Diaschisis=7 | No follow-up | Xe                                              | XeCT    |
| Martina<br>Sebök 2018       | n=25, M<br>18, F 7  | 57±15           | Cross-<br>sectional      | Switzerlan<br>d, Europe  | 7 | NHISS<br>admissio<br>n: 7(5)          | After the onset<br>of Stroke: ≥1week                 | Type of<br>vessels:<br>ICA/MCA            | CCD=10                                 | No follow-up | <sup>15</sup> O-H <sub>2</sub> O                | PET     |
| Hans<br>L.Lagrèze<br>1987   | n=7, M 7,<br>F 0    | 64.86±9.93      | Cross-<br>sectional      | USA,<br>North<br>America | 6 | No<br>NHISS<br>admissio<br>n          | After the onset<br>of Stroke: 6d-<br>47d             | Type of<br>vessels:<br>MCA                | Transhemispheric<br>Diaschisis=6       | No follow-up | <sup>18</sup> FCH <sub>3</sub>                  | PET     |
| Szilágyi G<br>2011          | n=10, M<br>7, F 3   | 59.4±7.2        | Cross-<br>sectional      | Hungary,<br>Europe       | 8 | No<br>NHISS<br>admissio<br>n          | After the onset<br>of Stroke: 7m-<br>76m             | Type of<br>vessels:<br>MCA                | CCD=4                                  | No follow-up | <sup>15</sup> O-butanol/18FDG                   | PET     |
| Makoto<br>Tanaka<br>1992    | n=12, M<br>7, F 5   | 59.5±14.86      | Cross-<br>sectional      | Japan,<br>Asia           | 6 | No<br>NHISS<br>admissio<br>n          | After the onset<br>of Stroke: ≥1m                    | Type of<br>vessels:<br>Small<br>vessels   | CCD=6                                  | No follow-up | <sup>15</sup> O/C <sup>15</sup> O <sub>2</sub>  | PET     |
| J.De Reuck<br>1997          | n=28, M<br>23, F 5  | 64(27-79)       | Retrospecti<br>ve cohort | Belgium,<br>Europe       | 6 | No<br>NHISS<br>admissio<br>n          | After the onset<br>of Stroke: 4m-<br>24m             | Type of<br>vessels:<br>MCA                | CCD=8                                  | No follow-up | <sup>15</sup> O /C <sup>15</sup> O <sub>2</sub> | PET     |
| Vince I<br>Madaï 2011       | n=25, M<br>13, F 12 | 58.44±11.8<br>1 | Retrospecti<br>ve cohort | Germany,<br>Europe       | 7 | NHISS<br>admissio                     | After the onset<br>of Stroke: more                   | Type of<br>vessels:                       | CCD=22                                 | No follow-up | <sup>15</sup> O -H <sub>2</sub> O               | PET     |

|                           |                  |           |                      |                     |   |                       |                                     |                                            |                                          |                   |                                                                    |      |
|---------------------------|------------------|-----------|----------------------|---------------------|---|-----------------------|-------------------------------------|--------------------------------------------|------------------------------------------|-------------------|--------------------------------------------------------------------|------|
|                           |                  |           |                      |                     |   | n: 9.48±5.97          | ≤48h, less 192h-900h                | MCA                                        |                                          |                   |                                                                    |      |
| P.PANTANO 1986            | n=55, M 29, F 26 | 61±14     | Cross-sectional      | Italy, Europe       | 8 | No NHISS admission    | After the onset of Stroke: 2d-3y    | Type of vessels: ICA                       | CCD=29                                   | No follow-up      | <sup>15</sup> O /C <sup>15</sup> O <sub>2</sub>                    | PET  |
| Hiroshi Yamauchi 1994     | n=11, M 8, F 3   | 61.8±3    | Cross-sectional      | Japan, Asia         | 6 | No NHISS admission    | After the onset of Stroke: ≥1m      | Type of vessels: ICA/MCA                   | CCD=10                                   | No follow-up      | <sup>15</sup> O /C <sup>15</sup> O <sub>2</sub>                    | PET  |
| S Pappata 1990            | n=15             | Unknown   | Cross-sectional      | France, Europe      | 5 | No NHISS admission    | After the onset of Stroke: 10d-65d  | Type of vessels: Small vessels             | Ipsilateral Cortical Diaschisis=3, CCD=5 | No follow-up      | <sup>15</sup> O/C <sup>15</sup> O <sub>2</sub> / <sup>18</sup> FDG | PET  |
| Jeffrey A 1989            | n=19             | 61.6±4.1  | Case-control         | USA, North America  | 7 | No NHISS admission    | After the onset of Stroke: 5d-65d   | Type of vessels: Unilateral Supratentorial | Transhemispheric Diaschisis=14           | No follow-up      | <sup>18</sup> FCH <sub>3</sub>                                     | PET  |
| Hiroyuki Miura 1994       | n=35, M 24, F 11 | 62.9±7.2  | Cross-sectional      | Japan, Asia         | 6 | No NHISS admission    | After the onset of Stroke: 1d-2336d | Type of vessels: MCA                       | CCD=31, CCD=23 (5y)                      | 5y Follow-up      | <sup>15</sup> O                                                    | PET  |
| Jacques De Reuck 1995     | n=28, M 23, F 5  | 64(27-79) | Case-control         | Belgium, Europe     | 6 | No NHISS admission    | After the onset of Stroke: 4m-24m   | Type of vessels: MCA                       | CCD+ITD=17                               | No follow-up      | <sup>15</sup> O /C <sup>15</sup> O <sub>2</sub>                    | PET  |
| Klaus Tatsch 2003         | n=11, M 4, F 7   | 55.8±6.7  | Case-control         | Germany, Europe     | 6 | No NHISS admission    | After the onset of Stroke: Chronic  | Type of vessels: Small vessels             | CCD=6                                    | No follow-up      | <sup>18</sup> FDG                                                  | PET  |
| Carlo Serrati 1994        | n=16, M 8, F 8   | 73.4±7.2  | Case-control         | France, Europe      | 7 | No NHISS admission    | After the onset of Stroke: 5h-30h   | Type of vessels: MCA                       | CCD=9, CCD=4 (follow up)                 | 13d-56d follow-up | <sup>15</sup> O /C <sup>15</sup> O <sub>2</sub>                    | PET  |
| Martina Sebök 2020        | n=24, M 21, F 4  | 68±10     | Prospective cohort   | Switzerland, Europe | 8 | No NHISS admission    | After the onset of Stroke: >7d      | Type of vessels: ICA                       | CCD=8                                    | No follow-up      |                                                                    | fMRI |
| Lita von Bieberstein 2020 | n=25, M 19, F 6  | 65(33-81) | Retrospective cohort | Switzerland, Europe | 6 | NHISS admission: 3(5) | After the onset of Stroke: Subacute | Type of vessels: ICA                       | CCD=11                                   | No follow-up      |                                                                    | fMRI |
| C.H.B.van Niftrik 2021    | n=17, M 13, F 4  | 58.3±12.9 | Case-control         | Switzerland, Europe | 7 | No NHISS admission    | After the onset of Stroke: >3w      | Type of vessels: ICA/MCA                   | ITD=9, CCD=7                             | No follow-up      |                                                                    | fMRI |
